# Supplementary material for: In situ mass spectrometry analysis of chemical vapour deposition of TiO2thin films to study gas phase mechanisms
Source: Royal Society of Chemistry journal article supplement (doi:10.1039/c6ra22801a), 2016-01-01

ESI – 1

Mass spectrum of deposition with  $0.4 \text{ L min}^{-1} \text{TiCl}_4$  and  $0.4 \text{ L min}^{-1}$  ethyl acetate at  $300^\circ \text{C}$ , showing only peaks for  $\text{TiCl}_4$  and ethyl acetate precursors with no visible intermediates.

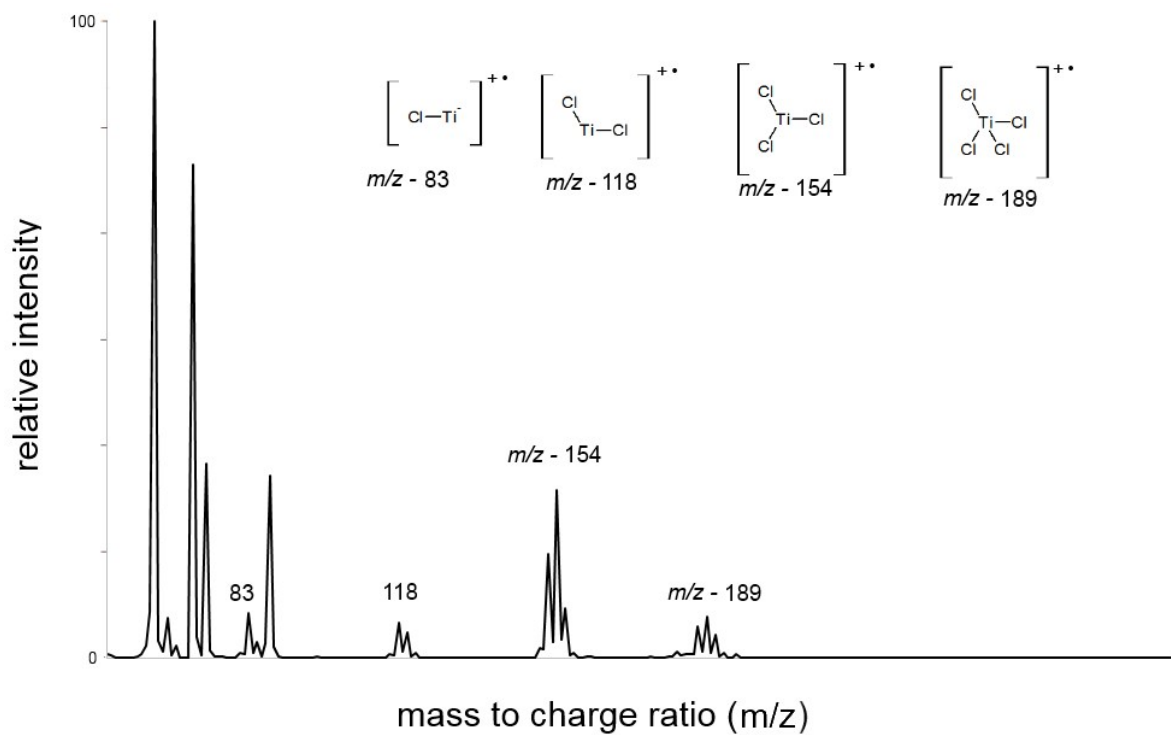

ESI – 2

SEM image of TiO<sub>2</sub> thin film deposited from 0.4 L min<sup>-1</sup> TiCl<sub>4</sub> and 0.4 L min<sup>-1</sup> ethyl acetate at 300 °C.

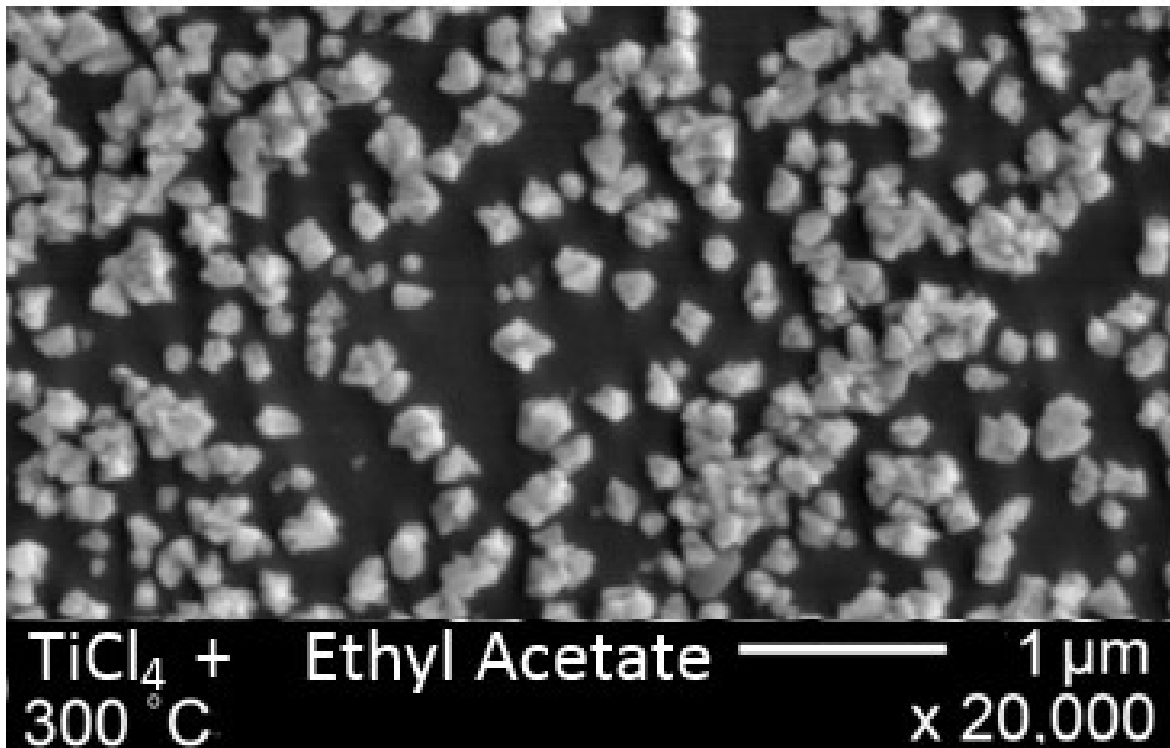

Supplement: c6ra22801a1.pdf [file c6ra22801a1.pdf]
